# Supplementary material for: Near-Infrared Spectroscopy for Monitoring Sternocleidomastoid Muscular Oxygenation during Isometric Flexion for Patients with Mild Nonspecific Neck Pain: A Pilot Study
Source: Sensors (Basel). 2020 Apr 13;20(8):2197. doi: 10.3390/s20082197 (PMC7218888; doi:10.3390/s20082197)
Supplement: Supplementary file 1 [file sensors-20-02197-s001.pdf]

## Supporting Information

# Near-Infrared Spectroscopy for Monitoring Sternocleidomastoid Muscular Oxygenation during Isometric Flexion for Patients with Mild Nonspecific Neck Pain: A Pilot Study

**Chia-Chi Yang** <sup>1,2</sup>, **Po-Ching Yang** <sup>3</sup>, **Jia-Jin J. Chen** <sup>4,5</sup>, **Yi-Horng Lai** <sup>6</sup>, **Chia-Han Hu** <sup>3</sup>,  
**Yung Chang** <sup>4</sup>, **Shihfan Jack Tu** <sup>3</sup> and **Lan-Yuen Guo** <sup>2,3,7,8,\*</sup>

<sup>1</sup> The Master Program of Long-Term Care in Aging, College of Nursing, Kaohsiung Medical University, Kaohsiung, Taiwan; [chiachiyang@kmu.edu.tw](mailto:chiachiyang@kmu.edu.tw)

<sup>2</sup> Center for Long-Term Care Research, Kaohsiung Medical University, Kaohsiung 807, Taiwan

<sup>3</sup> Department of Sports Medicine, College of Medicine, Kaohsiung Medical University, Kaohsiung 807, Taiwan; [s8784195@gmail.com](mailto:s8784195@gmail.com) (P.-C.Y.); [jiaalhan@gmail.com](mailto:jiaalhan@gmail.com) (C.-H.H.); [jackshtu@gmail.com](mailto:jackshtu@gmail.com) (S.J.T.)

<sup>4</sup> Department of BioMedical Engineering, College of Engineering, National Cheng Kung University, Tainan 701, Taiwan; [chenjj@mail.ncku.edu.tw](mailto:chenjj@mail.ncku.edu.tw) (J.-J.C.); [changyung1205@hotmail.com](mailto:changyung1205@hotmail.com) (Y.C.)

<sup>5</sup> Medical Device Innovation Center, National Cheng Kung University, Tainan 701, Taiwan

<sup>6</sup> School of Mechanical and Electrical Engineering, Xiamen University Tan Kah Kee College, Fujian 361005, China; [lai81.tom@gmail.com](mailto:lai81.tom@gmail.com)

<sup>7</sup> Ph. D. Program in Biomedical Engineering, College of Medicine, Kaohsiung Medical University, Kaohsiung 807, Taiwan

<sup>8</sup> Department of Medical Research, Kaohsiung Medical University Hospital, Kaohsiung 807, Taiwan

\* Correspondence: [yuen@kmu.edu.tw](mailto:yuen@kmu.edu.tw); Tel.: +886-7-3121101-2646-614

Received: 28 February 2020; Accepted: 8 April 2020; Published: 13 April 2020

Table S1. Adipose tissue thickness and muscular oxygenation variables of interest for male and female individual

|                                                           | <b>Male</b><br>(pooled data of neck pain<br>and asymptomatic<br>individuals) | <b>Female</b><br>(pooled data of neck pain<br>and asymptomatic<br>individuals) | <b>P-values</b> |
|-----------------------------------------------------------|------------------------------------------------------------------------------|--------------------------------------------------------------------------------|-----------------|
| <b>Adipose tissue<br/>thickness (mm)</b>                  | 0.54 ± 0.19                                                                  | 0.56 ± 0.25                                                                    | 0.882           |
| <b>Baseline StO<sub>2</sub> (%)</b>                       | 83.30 ± 3.41                                                                 | 84.97 ± 3.22                                                                   | 0.882           |
| <b>ΔStO<sub>2</sub> (%)</b>                               | 14.67 ± 7.10                                                                 | 17.17 ± 5.80                                                                   | 0.456           |
| <b>Half-deoxygenation<br/>time of StO<sub>2</sub> (s)</b> | 12.52 ± 2.32                                                                 | 11.63 ± 2.42                                                                   | 0.456           |
| <b>Half-reoxygenation<br/>time of StO<sub>2</sub> (s)</b> | 6.14 ± 2.68                                                                  | 7.91 ± 2.34                                                                    | 0.230           |
| <b>Median frequency<br/>(Hz)</b>                          | 0.33 ± 0.14                                                                  | 0.32 ± 0.14                                                                    | 0.710           |

Data are shown as mean ± standard deviation. Because of non-normal distribution of these variables verified by the Kolmogorov-Smirnov test, a non-parametric Mann-Whitney *U* test was chosen to further determine whether differences existed between the two tested populations. The results were considered to be statistically significant if the *P*-value was below 0.05.

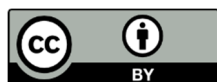

© 2020 by the authors. Licensee MDPI, Basel, Switzerland. This article is an open access article distributed under the terms and conditions of the Creative Commons Attribution (CC BY) license (<http://creativecommons.org/licenses/by/4.0/>).
